# Supplementary material for: Molecular Insights into IQSEC2 Disease
Source: MDPI journal article supplement (doi:10.3390/ijms24054984), 2023-03-05
Supplement: s1 [file s1]

Table S2. Non Missense IQSEC2 Mutations

| No. | Mutation                                            | Ref |
|-----|-----------------------------------------------------|-----|
| 1   | c.55_151delinsAT p.Ala19Ile fs*32                   | 1   |
| 2   | c.83_85del p.Asp28del                               | 1   |
| 3   | c.88_90delATC p.Ile30del                            | 1   |
| 4   | c.97C>T p.Gln33*                                    | 1   |
| 5   | c.184C>T p.Arg62*                                   | 1   |
| 6   | c.267C>Gp. Thr89*                                   | 2   |
| 7   | c.273_282del p.Asn91Lys fs*112                      | 1   |
| 8   | c.316C > T p.Gln106*                                | 3   |
| 9   | c.325delC insGC p. Gln1084Ala fs*22                 | 4   |
| 10  | c.443_444dup p.Ala149Gln fs*58                      | 3   |
| 11  | c.556C > A p. S189*                                 | 5   |
| 12  | c.588_610del p.Arg197Ala fs*34                      | 6   |
| 13  | c.675dup p.Ser226 fs                                | 7   |
| 14  | c.737+10385del p.?                                  | 6   |
| 15  | c.738-1G>A Splicing                                 | 1   |
| 16  | c.804delC p.Try269Thr fs*3                          | 1   |
| 17  | c.847_848del insT, p.Gly283Ser fs*23                | 4   |
| 18  | c.854del p.Pro285Leu fs*21                          | 1   |
| 19  | c.895C>T p.Gln299*                                  | 1   |
| 20  | c.928G>T p.Glu310*                                  | 1   |
| 21  | c.999+8A>G                                          | 2   |
| 22  | c.1000_1034del splicing                             | 1   |
| 23  | c.1170dupG p.Gln391Ala fs*5                         | 8   |
| 24  | c.1405_1406 del p.Lys469Val fs*4                    | 1   |
| 25  | c.1417G> T p.Glu473*                                | 3   |
| 26  | chrX: 53251127_53251128 dup p.Ser484*               | 9   |
| 27  | c.1459_1460delAT p.Met487Val fs*2                   | 10  |
| 28  | c.1510C>T p.Gln504*                                 | 1   |
| 29  | c.1556_1599delACCT, p.Tyr519Trp fs*87               | 4   |
| 30  | c.1567_2199 del ins GGC p.Thr523_Thr733 del ins Gly | 1   |
| 31  | c.1591C> T, p. Arg531*                              | 4   |
| 32  | c.1618C>T p.Gln540*                                 | 1   |
| 33  | c.1744_1763 del p.Arg582Cys fs*9                    | 1   |
| 34  | c.1813_1814del, p.Asp605Pro fs*3                    | 11  |
| 35  | c.1861dup                                           | 12  |
| 36  | c.1881delC p.His629Met fs*4                         | 2   |
| 37  | c.1983_1999 del p.Leu662Gln fs*25                   | 1   |
| 38  | c.2026del p.Ala676Leu fs*46                         | 13  |
| 39  | c.2052_2053 delCG p.Cys684*                         | 1   |
| 40  | c.2078delG p.Gly693Val*29                           | 1   |
| 41  | c.2184C > G p.Tyr728*                               | 14  |
| 42  | c.2203C>T p.Gln735*                                 | 1   |
| 43  | c.2272C>T p.Arg758*                                 | 1   |
| 44  | c.2295_2297del p.Asn765del                          | 6   |

|    |                                          |    |
|----|------------------------------------------|----|
| 45 | c.2317C>T p.Gln773*                      | 1  |
| 46 | c.2317_2332del p.Gln773Glyfs*25          | 1  |
| 47 | c.2329G>T p.Glu777*                      | 15 |
| 48 | c.2459+21C>T splicing                    | 16 |
| 49 | c.2521C > T p.Glu841*                    | 7  |
| 50 | c.2563C>T p.Arg855*                      | 1  |
| 51 | c.2662dup p.Ile888Asn fs*16              | 1  |
| 52 | c.2679_2680 ins A p.Asp894 fs*10         | 1  |
| 53 | c.2776C>T p.Arg926*                      | 1  |
| 54 | c.2799C>G p.Try933*                      | 1  |
| 55 | c.2846_2852 del CCCAGGT p.Ser949Cys fs*7 | 1  |
| 56 | c.2854C>T p.Gln952*                      | 1  |
| 57 | c.2911C > T, p. Arg971*                  | 4  |
| 58 | c.2962C>T p.Gln988*                      | 1  |
| 59 | c.3079delC p.Leu1027Ser fs*75            | 1  |
| 60 | c.3097C>T p.Gln1033*                     | 1  |
| 61 | g.88032_88033del splicing                | 1  |
| 62 | c.3163C>T p.Arg1055*                     | 1  |
| 63 | c.3277+2T>G Splicing                     | 1  |
| 64 | c.3277+5G>A Splicing                     | 1  |
| 65 | c.3278C>A p.Ser1093*                     | 1  |
| 66 | c.3300dup p.Met1101Tyr fs*5              | 16 |
| 67 | c.3322C>T p.Gln1108*                     | 1  |
| 68 | c.3387C>A p.Tyr1129*                     | 1  |
| 69 | c.3433C>T p.Arg1145*                     | 1  |
| 70 | c.3457del p.Arg1153Gly fs*244            | 1  |
| 71 | c.3613_3613delC p. Leu1205Trp fs*192     | 2  |
| 72 | c.3669_3733del p.Thr1225Ser fs*4         | 1  |
| 73 | c.3780delG p.Gln1261Ser fs*136           | 2  |
| 74 | c.3801_3808dup p.Gln1270Arg fs*130 ,     | 10 |
| 75 | c.3859C>T p.Gln1287*                     | 2  |
| 76 | c.4039dupG p.Ala1347Gly fs*40            | 1  |
| 77 | c.4110-4111 del p. Tyr1371Gln fs*15      | 2  |
| 78 | c.4164dupC p.Ile1389 His fs*218          | 17 |
| 79 | c.4246_4247insG p.Ser1416 fs             | 18 |
| 80 | c.4401del p.Gly1468 Ala fs*27            | 1  |
| 81 | c.4419 Ser1474Val fs*21                  | 19 |
| 82 | c.4419_4420 insC Ser1474Gln fs*133       | 2  |
| 83 | c.4419_4431del p.Ser1474Arg fs*17        | 2  |
| 84 | chrX:52789239_53368927dup (579 kb)       | 1  |
| 85 | chrX:52911287_53315010dup (403 kb)       | 1  |
| 86 | chrX:52920728_53321125del (0.4 Mb)       | 1  |
| 87 | chrX:52954520_53315542dup (361 kb)       | 1  |
| 88 | chrX:53276030-53298472 dup/truncation    | 1  |
| 89 | chrX:53283513- 53325282 dup/truncation   | 1  |

|    |                                                                                                 |   |
|----|-------------------------------------------------------------------------------------------------|---|
| 90 | 46 X,t(X;20)(p11.2;q11.2) translocation                                                         | 1 |
| 91 | Dup on chr4: g.183693432_18375617dup gain 62 kb<br>Insertion point on chrX g. 53318362_53318363 | 1 |

Numbers preceded by c refer to nucleotide numbering of the IQSEC2 cDNA with +1 corresponding to the A of the ATG translation initiation codon in the reference sequence for the IQSEC2 gene [GenBank: NM\_001111125.2]. Numbers preceded by p refer to the amino acid number of the 1488 amino acid isoform of the IQSEC2 protein. \* indicates introduction of a termination codon after the indicated number of amino acids where relevant. dup = duplication; ins=insertion; del=deletion; fs=frameshift.

- (1) Shoubridge, C.; Harvey, R. J.; Dudding-Byth, T. IQSEC2 mutation update and review of the female-specific phenotype spectrum including intellectual disability and epilepsy. *Hum Mutat* **2019**, *40* (1), 5-24. DOI: 10.1002/humu.23670 From NLM Medline.
- (2) Lopergolo, D.; Privitera, F.; Castello, G.; Lo Rizzo, C.; Mencarelli, M. A.; Pinto, A. M.; Ariani, F.; Curro, A.; Lamacchia, V.; Canitano, R.; et al. IQSEC2 disorder: A new disease entity or a Rett spectrum continuum? *Clin Genet* **2021**, *99* (3), 462-474. DOI: 10.1111/cge.13908 From NLM Medline.
- (3) Liu, X.; Zhang, S.; Wan, L.; Zhang, X.; Wang, H.; Zhang, H.; Zhu, G.; Liang, Y.; Yan, H.; Zhang, B.; et al. IQSEC2-related encephalopathy in male children: Novel mutations and phenotypes. *Front Mol Neurosci* **2022**, *15*, 984776. DOI: 10.3389/fnmol.2022.984776 From NLM PubMed-not-MEDLINE.
- (4) Radley, J. A.; O'Sullivan, R. B. G.; Turton, S. E.; Cox, H.; Vogt, J.; Morton, J.; Jones, E.; Smithson, S.; Lachlan, K.; Rankin, J.; et al. Deep phenotyping of 14 new patients with IQSEC2 variants, including monozygotic twins of discordant phenotype. *Clin Genet* **2019**, *95* (4), 496-506. DOI: 10.1111/cge.13507 From NLM Medline.
- (5) Jackson, M. R.; Loring, K. E.; Homan, C. C.; Thai, M. H.; Maattanen, L.; Arvio, M.; Jarvela, I.; Shaw, M.; Gardner, A.; Gecz, J.; et al. Heterozygous loss of function of IQSEC2/Iqsec2 leads to increased activated Arf6 and severe neurocognitive seizure phenotype in females. *Life Sci Alliance* **2019**, *2* (4). DOI: 10.26508/lsa.201900386 From NLM Medline.
- (6) Mignot, C.; McMahon, A. C.; Bar, C.; Campeau, P. M.; Davidson, C.; Buratti, J.; Nava, C.; Jacquemont, M. L.; Tallot, M.; Milh, M.; et al. IQSEC2-related encephalopathy in males and females: a comparative study including 37 novel patients. *Genet Med* **2019**, *21* (4), 837-849. DOI: 10.1038/s41436-018-0268-1 From NLM Medline.
- (7) Yang, M.; Xu, B.; Wang, J.; Zhang, Z.; Xie, H.; Wang, H.; Hu, T.; Liu, S. Genetic diagnoses in pediatric patients with epilepsy and comorbid intellectual disability. *Epilepsy Res* **2021**, *170*, 106552. DOI: 10.1016/j.epilepsyres.2021.106552 From NLM Medline.
- (8) Accogli, A.; Eric Jarvis, G.; Schiavetto, A.; Lai, L.; Amirali, E. L.; Jimenez Cruz, D. A.; Riviere, J. B.; Trakadis, Y. Psychiatric features and variable neurodevelopment outcome in four females with IQSEC2 spectrum disorder. *J Genet* **2020**, *99*. From NLM Medline.
- (9) Nagabushana, D.; Chatterjee, A.; Kenchaiah, R.; Asranna, A.; Arunachal, G.; Mundlamuri, R. C. Response to Steroids in IQSEC2-Related Encephalopathy Presenting

- with Rett-Like Phenotype and Infantile Spasms. *J Pediatr Genet* **2023**, *12* (1), 76-80. DOI: 10.1055/s-0040-1721371 From NLM PubMed-not-MEDLINE.
- (10) Wang, D. H.; Niu, X. Y.; Cheng, M. M.; Chen, Y.; Yang, Y.; Yang, X. L.; Yang, Z. X.; Zhang, Y. H. [Genotypes and phenotypes of IQSEC2 gene variants related epilepsy]. *Zhonghua Er Ke Za Zhi* **2022**, *60* (12), 1317-1321. DOI: 10.3760/cma.j.cn112140-20220614-00550 From NLM Medline.
- (11) Wayhelova, M.; Ryzi, M.; Oppelt, J.; Hladilkova, E.; Vallova, V.; Krskova, L.; Vilemova, M.; Polackova, H.; Gaillyova, R.; Kuglik, P. Novel familial IQSEC2 pathogenic sequence variant associated with neurodevelopmental disorders and epilepsy. *Neurogenetics* **2020**, *21* (4), 269-278. DOI: 10.1007/s10048-020-00616-3 From NLM Medline.
- (12) Zhao, J.; Yang, X.; Li, J.; Wang, H.; Zhang, W.; Fang, F. [Analysis of IQSEC2 gene variant in a child with X-linked mental retardation]. *Zhonghua Yi Xue Yi Chuan Xue Za Zhi* **2022**, *39* (4), 421-424. DOI: 10.3760/cma.j.cn511374-20201030-00765 From NLM Medline.
- (13) Essajee, F.; Urban, M.; Smit, L.; Wilmschurst, J. M.; Solomons, R.; van Toorn, R.; Moosa, S. Utility of genetic testing in children with developmental and epileptic encephalopathy (DEE) at a tertiary hospital in South Africa: A prospective study. *Seizure* **2022**, *101*, 197-204. DOI: 10.1016/j.seizure.2022.09.001 From NLM Medline.
- (14) Berger, S. I.; Ciccone, C.; Simon, K. L.; Malicdan, M. C.; Vilboux, T.; Billington, C.; Fischer, R.; Introne, W. J.; Gropman, A.; Blancato, J. K.; et al. Exome analysis of Smith-Magenis-like syndrome cohort identifies de novo likely pathogenic variants. *Hum Genet* **2017**, *136* (4), 409-420. DOI: 10.1007/s00439-017-1767-x From NLM Medline.
- (15) Karaman Mercan, T.; Altiok Clark, O.; Erkal, O.; Nur, B.; Mihci, E.; Karaman, B.; Senol, A. U.; Berker Karauzum, S. Coexistence of a Homozygous Chromosome 4q35.2 Deletion and Hidden IQSEC2 Pathogenic Variant in a Child with Intellectual Disability. *Cytogenet Genome Res* **2021**, *161* (3-4), 153-159. DOI: 10.1159/000515368 From NLM Medline.
- (16) Baladron, B.; Mielu, L. M.; Lopez-Martin, E.; Barrero, M. J.; Lopez, L.; Alvarado, J. I.; Monzon, S.; Varona, S.; Cuesta, I.; Cazorla, R.; et al. Differences in Expression of IQSEC2 Transcript Isoforms in Male and Female Cases with Loss of Function Variants and Neurodevelopmental Disorder. *Int J Mol Sci* **2022**, *23* (16). DOI: 10.3390/ijms23169480 From NLM Medline.
- (17) Zou, Q.; Zheng, J.; Zhang, R.; Fang, Y.; Cai, C. A case of intellectual disability reveals a novel mutation in IQSEC2 gene by whole exome sequencing. *Psychiatr Genet* **2019**, *29* (6), 243-247. DOI: 10.1097/YPG.0000000000000232 From NLM Medline.
- (18) Liu, J.; Tong, L.; Song, S.; Niu, Y.; Li, J.; Wu, X.; Zhang, J.; Zai, C. C.; Luo, F.; Wu, J.; et al. Novel and de novo mutations in pediatric refractory epilepsy. *Mol Brain* **2018**, *11* (1), 48. DOI: 10.1186/s13041-018-0392-5 From NLM Medline.
- (19) Barrie, E. S.; Cottrell, C. E.; Gastier-Foster, J.; Hickey, S. E.; Patel, A. D.; Santoro, S. L.; Alfaro, M. P. Genotype-phenotype correlation: Inheritance and variant-type infer pathogenicity in IQSEC2 gene. *Eur J Med Genet* **2020**, *63* (3), 103735. DOI: 10.1016/j.ejmg.2019.103735 From NLM Medline.
