# Supplementary material for: Molecular Insights into IQSEC2 Disease
Source: MDPI journal article supplement (doi:10.3390/ijms24054984), 2023-03-05
Supplement: s1 [file s1]

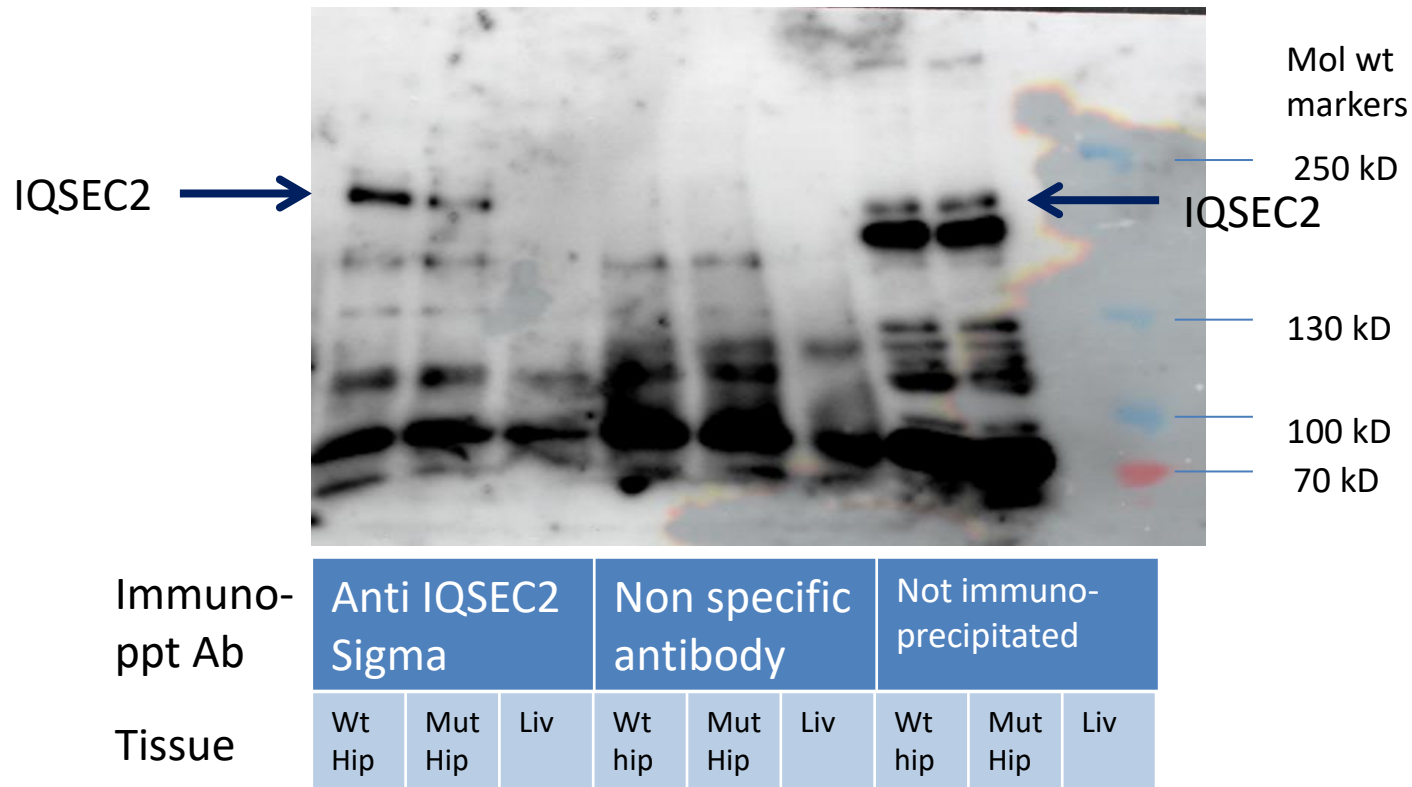

**Figure S1. Western blot IQSEC2.** Hippocampal (Hip) or liver (Liv) tissue extract (20 ug) from wild type (Wt) or A350V transgenic (Mut) mice was run on an SDS-PAGE reducing gel directly or immunoprecipitated from 800 ug extract with 10 ul A/G agarose beads loaded with anti-IQSEC2 mAb (Sigma SAB14112810) or a non-specific antibody (SantaCruz anti-apo A1 FL-267). The Western was developed with anti IQSEC2 (GeneTex GTX32143). IQSEC2 is projected to be 162 kD. Arrows indicate the position of IQSEC2 protein.
