# Supplementary material for: Molecular Insights into IQSEC2 Disease
Source: MDPI journal article supplement (doi:10.3390/ijms24054984), 2023-03-05
Supplement: s1 [file s1]

Table S1. Missense IQSEC2 Mutations

| No. | Mutation                  | Ref |
|-----|---------------------------|-----|
| 1   | c.128G>C p.Arg43Pro       | 1   |
| 2   | c.770G>A p.Ser257Asn      | 2   |
| 3   | c.1048G>A p.Ala350Thr     | 3   |
| 4   | c.1049C>T p.Ala350Val     | 4   |
| 5   | c.1049C>A p.Ala350Asp     | 4   |
| 6   | c.1075C>T p.Arg359Cys     | 4   |
| 7   | c.1076 G>A p. Arg359His   | 5   |
| 8   | c.1688G>A p.Arg563Gln     | 4   |
| 9   | c.2117A > G p. Asn706Ser  | 6   |
| 10  | c.2273G>A p.Arg758Gln     | 4   |
| 11  | c.2278G>A p.Gly760Ser     | 4   |
| 12  | c.2293A>G p.Asn765Asp     | 7   |
| 13  | c.2312G>A p.Gly771Asp     | 4   |
| 14  | c.2354C>T p.Pro785Leu     | 4   |
| 15  | c.2366C>T p.Ala789Val     | 4   |
| 16  | c.2402A>C p.Gln801Pro     | 4   |
| 17  | c.2507C>T p.Ala836Val     | 4   |
| 18  | c.2582G>C p.Ser861Thr     | 4   |
| 19  | c.2587C>T p. Arg863Trp    | 4   |
| 20  | c.2752G>T p.Val918Phe     | 8   |
| 21  | c.2857G > A p.Ala953Thr   | 9   |
| 22  | c.2909G > A p.Arg970His   | 9   |
| 23  | c.2983C>T p.Arg995Trp     | 10  |
| 24  | c.2995C>T p.Leu999Phe     | 4   |
| 25  | c.3005A > G p.Asp1002Gly  | 9   |
| 26  | c. 3011 T>C p. Leu1004Prp | 5   |
| 27  | c.3030C > G p.Phe1010Leu  | 9   |
| 28  | c.3034A>G p. Lys1012Glu   | 8   |
| 29  | c. 3065G>A p.Arg1022His   | 11  |
| 30  | c.3206G>C p. Arg1069Pro   | 4   |
| 31  | c.3206G > A p.Arg1069Gln  | 9   |
| 32  | c.3235T > C p.Ser1079Pro  | 12  |
| 33  | c.3364C>T p.Arg1122Cys    | 13  |
| 34  | c.3412G > C p. Gly1138Arg | 6   |
| 35  | c.3415G>A p.Alal139Thr    | 8   |
| 36  | c.3463C>T p.Arg1155Trp    | 8   |
| 37  | c.4204 G>A p. Arg1402Thr  | 5   |

Numbers preceeded by c refer to nucleotide numbering of the IQSEC2 cDNA with +1 corresponding to the A of the ATG translation initiation codon in the reference sequence for the IQSEC2 gene [GenBank: NM\_001111125.2]. Numbers proceeded by p refer to the amino acid number of the 1488 amino acid isoform of the IQSEC2 protein.

- (1) Ibarluzea, N.; Hoz, A. B.; Villate, O.; Llano, I.; Ocio, I.; Marti, I.; Guitart, M.; Gabau, E.; Andrade, F.; Gener, B.; et al. Targeted Next-Generation Sequencing in Patients with Suggestive X-Linked Intellectual Disability. *Genes (Basel)* **2020**, *11* (1). DOI: 10.3390/genes11010051 From NLM Medline.
- (2) Accogli, A.; Eric Jarvis, G.; Schiavetto, A.; Lai, L.; Amirali, E. L.; Jimenez Cruz, D. A.; Riviere, J. B.; Trakadis, Y. Psychiatric features and variable neurodevelopment outcome in four females with IQSEC2 spectrum disorder. *J Genet* **2020**, *99*. From NLM Medline.
- (3) Choi, M. H.; Yang, J. O.; Min, J. S.; Lee, J. J.; Jun, S. Y.; Lee, Y. J.; Yoon, J. Y.; Jeon, S. J.; Byeon, J.; Kang, J. W.; Kim, N. S. A Novel X-Linked Variant of IQSEC2 is Associated with Lennox–Gastaut Syndrome and Mild Intellectual Disability in Three Generations of a Korean Family. *Genet Test Mol Biomarkers* **2020**, *24*.
- (4) Shoubbridge, C.; Harvey, R. J.; Dudding-Byth, T. IQSEC2 mutation update and review of the female-specific phenotype spectrum including intellectual disability and epilepsy. *Hum Mutat* **2019**, *40* (1), 5-24. DOI: 10.1002/humu.23670 From NLM Medline.
- (5) Lopergolo, D.; Privitera, F.; Castello, G.; Lo Rizzo, C.; Mencarelli, M. A.; Pinto, A. M.; Ariani, F.; Curro, A.; Lamacchia, V.; Canitano, R.; et al. IQSEC2 disorder: A new disease entity or a Rett spectrum continuum? *Clin Genet* **2021**, *99* (3), 462-474. DOI: 10.1111/cge.13908 From NLM Medline.
- (6) Radley, J. A.; O'Sullivan, R. B. G.; Turton, S. E.; Cox, H.; Vogt, J.; Morton, J.; Jones, E.; Smithson, S.; Lachlan, K.; Rankin, J.; et al. Deep phenotyping of 14 new patients with IQSEC2 variants, including monozygotic twins of discordant phenotype. *Clin Genet* **2019**, *95* (4), 496-506. DOI: 10.1111/cge.13507 From NLM Medline.
- (7) Wang, D. H.; Niu, X. Y.; Cheng, M. M.; Chen, Y.; Yang, Y.; Yang, X. L.; Yang, Z. X.; Zhang, Y. H. [Genotypes and phenotypes of IQSEC2 gene variants related epilepsy]. *Zhonghua Er Ke Za Zhi* **2022**, *60* (12), 1317-1321. DOI: 10.3760/cma.j.cn112140-20220614-00550 From NLM Medline.
- (8) Mignot, C.; McMahon, A. C.; Bar, C.; Campeau, P. M.; Davidson, C.; Buratti, J.; Nava, C.; Jacquemont, M. L.; Tallot, M.; Milh, M.; et al. IQSEC2-related encephalopathy in males and females: a comparative study including 37 novel patients. *Genet Med* **2019**, *21* (4), 837-849. DOI: 10.1038/s41436-018-0268-1 From NLM Medline.
- (9) Shoubbridge, C.; Dudding-Byth, T.; Pasquier, L.; Goel, H.; Yap, P.; McConnell, V. IQSEC2-related encephalopathy in males due to missense variants in the pleckstrin homology domain. *Clin Genet* **2022**, *102* (1), 72-77. DOI: 10.1111/cge.14136 From NLM Medline.
- (10) Srivastava, S.; Desai, S.; Cohen, J.; Smith-Hicks, C.; Baranano, K.; Fatemi, A.; Naidu, S. Monogenic disorders that mimic the phenotype of Rett syndrome. *Neurogenetics* **2018**, *19* (1), 41-47. DOI: 10.1007/s10048-017-0535-3 From NLM Medline.
- (11) Takata, A.; Miyake, N.; Tsurusaki, Y.; Fukai, R.; Miyatake, S.; Koshimizu, E.; Kushima, I.; Okada, T.; Morikawa, M.; Uno, Y.; et al. Integrative Analyses of De Novo Mutations Provide Deeper Biological Insights into Autism Spectrum Disorder. *Cell Rep* **2018**, *22* (3), 734-747. DOI: 10.1016/j.celrep.2017.12.074 From NLM Medline.
- (12) Liu, X.; Zhang, S.; Wan, L.; Zhang, X.; Wang, H.; Zhang, H.; Zhu, G.; Liang, Y.; Yan, H.; Zhang, B.; et al. IQSEC2-related encephalopathy in male children: Novel

mutations and phenotypes. *Front Mol Neurosci* **2022**, *15*, 984776. DOI: 10.3389/fnmol.2022.984776 From NLM PubMed-not-MEDLINE.

(13) Mosallaei, M.; Ehtesham, N.; Beheshtian, M.; Khoshbakht, S.; Davarnia, B.; Kahrizi, K.; Najmabadi, H. Phenotype and genotype spectrum of variants in guanine nucleotide exchange factor genes in a broad cohort of Iranian patients. *Mol Genet Genomic Med* **2022**, *10* (4), e1894. DOI: 10.1002/mgg3.1894 From NLM Medline.
